# Supplementary material
Source: PubMed Central journal article supplement (PMC3431704)
Supplement: supp_M112.372656_jbc.M112.372656-1.pdf [file supp_M112.372656_jbc.M112.372656-1.pdf]

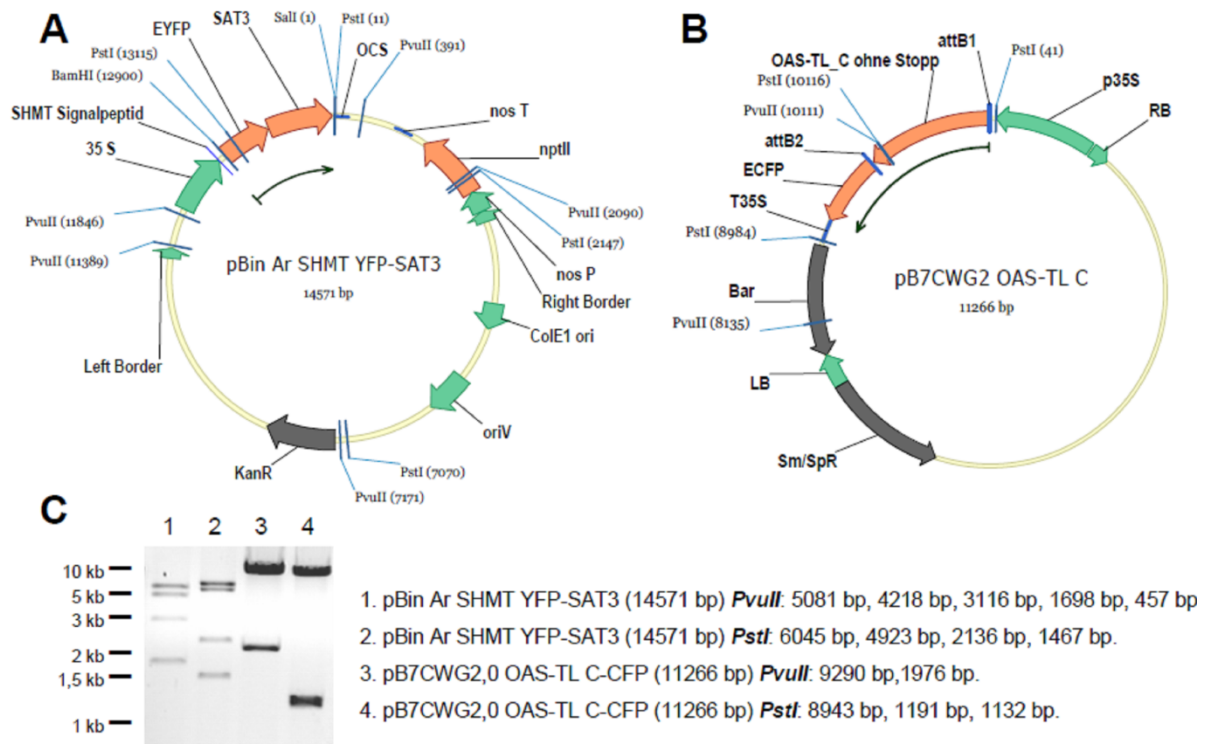

**Supplemental Figure 1: Vectors for transient expression of YFP-SAT and OAS-TL C CFP in mitochondria of *Nicotiana tabacum***

Coding sequence for full length OAS-TL C and mature SAT3 were amplified by PCR using the following primers combinations **p1/p2** and **p3/p4** and cloned in the vectors pB7CWG2 and pB7WGY2, respectively. The coding sequence for SAT in fusion with eYFP was further amplified for cloning in the vector pBin AR SHMT using the primers **p5** and **p6**. **(A)** The resulting vector pBinAr SHMT YFP-SAT3 encoded for a mitochondrial targeted SAT3 that was N-terminally fused with eYFP (Y-SAT). **(B)** The vector pB7CWG2 OAS-TL C encoded for full length OAS-TL C that was fused C-terminally to eCFP (OAS-C). OAS C is targeted to mitochondria by native transit peptide of OAS-TL C. **(C)** Sequence of pBinAr SHMT YFP-SAT3 and pB7CWG2 OAS-TL C were verified by restriction analysis and sequencing (data not shown)

List of primers

p1: GGGGACAAGTTTGTACAAAAAAGCAGGCTTCATGGTGGCGATGATCATGG

p2: GGGGACCACTTTGTACAAGAAAGCTGGGTTTACCTCAGGCTGCATTTTC

p3: GGGGACAAGTTTGTACAAAAAAGCAGGCTATATGAACTACTTCCGTTATC

p4: GGGGACCACTTTGTACAAGAAAGCTGGGCTCAAATTACATAATCCGACC

p5: GGATCCTATGGTGAGCAAGGGCGAGG

p6: GTCGACTCAAATTACATAATCCGACC
