# Supplementary material
Source: PubMed Central journal article supplement (PMC3431704)
Supplement: supp_M112.372656_jbc.M112.372656-2.pdf [file supp_M112.372656_jbc.M112.372656-2.pdf]

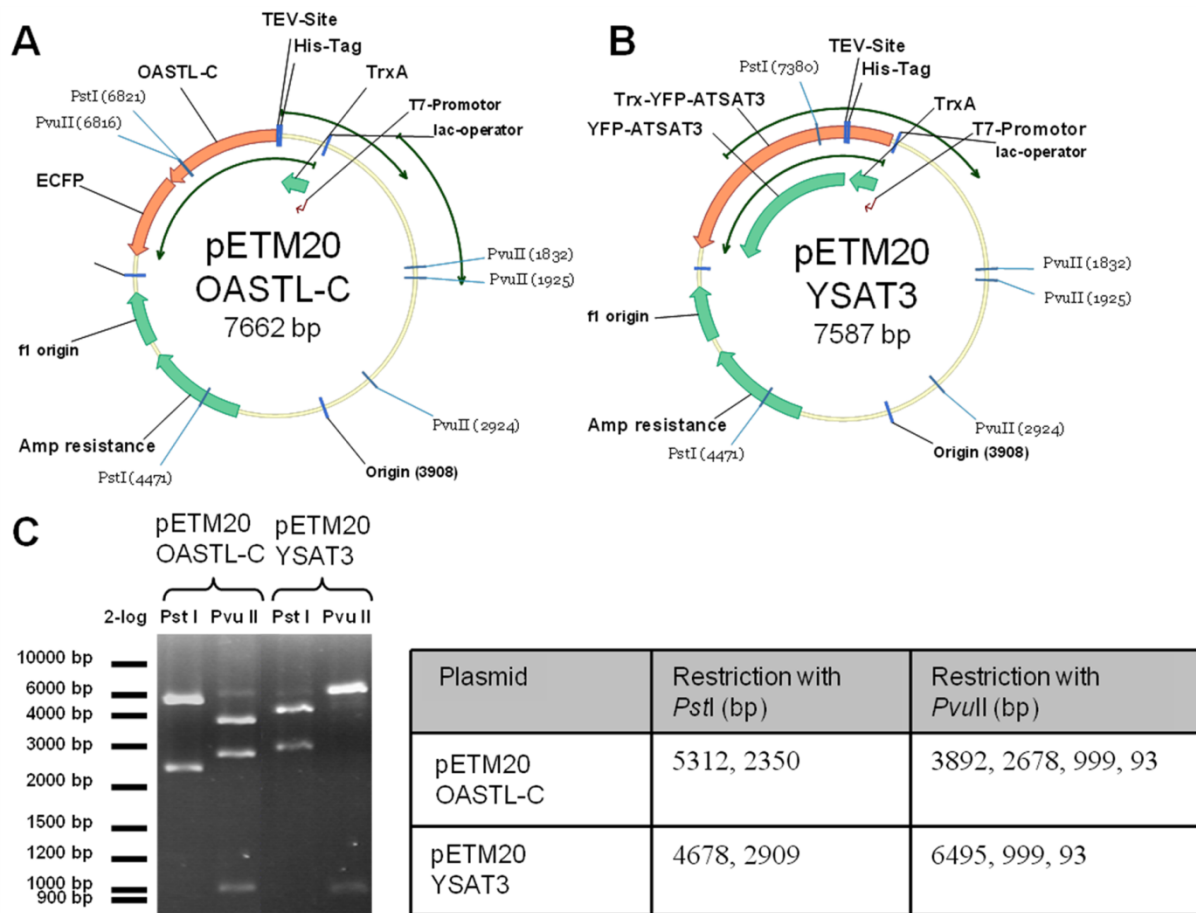

### Supplemental Figure 2: Vectors for expression of YFP-SAT and OAS-TL C CFP in *E. coli*

Coding sequence for full length OAS-TL C CFP and YFP SAT3 were amplified by PCR using the following primers combinations **p7/p8** and **p9/p10** from the plasmids pB7CWG2 OAS-TL C and pBinAr SHMT YFP-SAT3, respectively (Supplemental Figure 1). The resulting PCR products were cloned via *NcoI* and *XhoI* in the vector pETM20 for ectopic expression in *E. coli*. Sequence of pETM20 OASTL-C and pETM20 YSAT3 were verified by restriction analysis and sequencing (data not shown).

#### List of primers

P7: CCATGGCTGTTAAGCGCG

P8: GGATCCTTACTTGTACAGCTCGTC

P9: CCATGGGTATGGTGAGCAAGGGCGAG

P10: GGATCCTCAAATTACATAATCCGACC
