# Supplementary material
Source: PubMed Central journal article supplement (PMC3431704)
Supplement: supp_M112.372656_jbc.M112.372656-3.pdf [file supp_M112.372656_jbc.M112.372656-3.pdf]

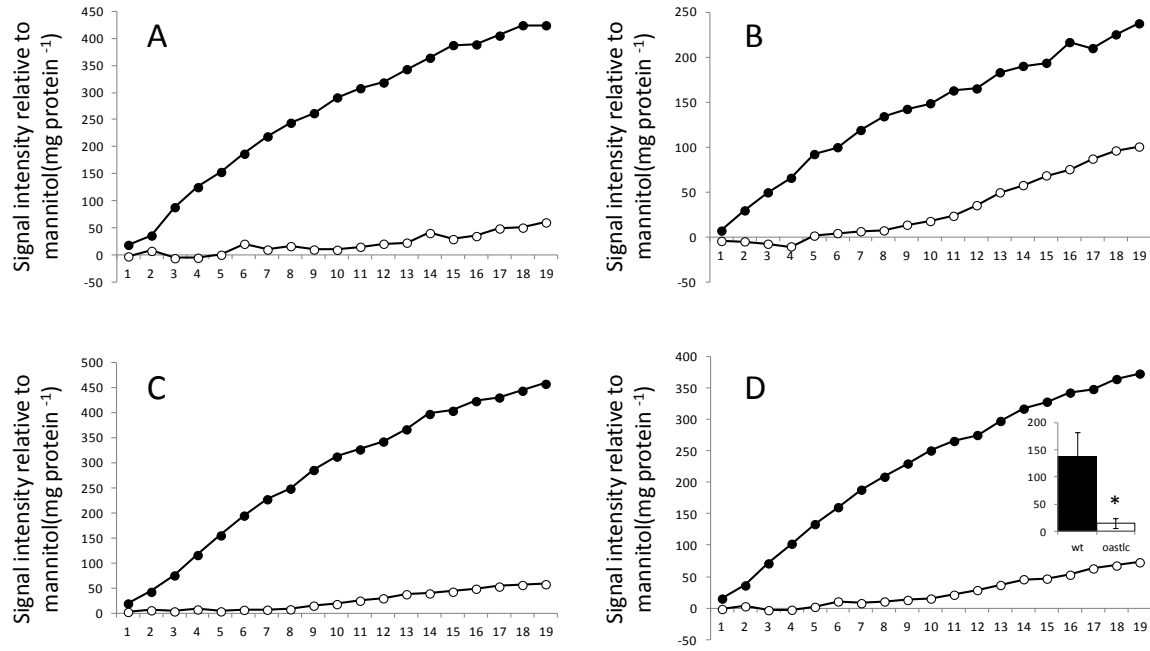

**Supplemental Figure 3: Effect of cysteine on the metabolism of [3- $^{13}\text{C}$ ]serine by WT and *oastl-C* *Arabidopsis* mitochondria.**

(A-C) Time-courses for the total acetyl-[3- $^{13}\text{C}$ ]serine  $^{13}\text{C}$  NMR signal observed during the metabolism of [3- $^{13}\text{C}$ ]serine by WT (●) and *oastl-C* (○) mitochondria in a medium containing 0.5 mM cysteine in three replicate experiments in which the  $^{13}\text{C}$  NMR spectra were recorded in successive 15 min blocks. (D) Averaged time-courses for the three replicate experiments. The inset shows that the production of total acetyl-[3- $^{13}\text{C}$ ]serine (OAS + NAS) by *oastl-C* mitochondria in the presence of 0.5 mM cysteine was significantly reduced in comparison with the WT mitochondria ( $p = 0.035$ ) over the first 2.5 h of the time-course. OAS +NAS production is expressed as signal intensity relative to the mannitol signal per mg protein.
